# Supplementary material for: The development of CRISPR for a mollusc establishes the formin Lsdia1 as the long-sought gene for snail dextral/sinistral coiling
Source: Oxford University Press journal article supplement (doi:10.1242/dev.175976), 2019-05-01
Supplement: dev175976supp.pdf [file dev175976supp.pdf]

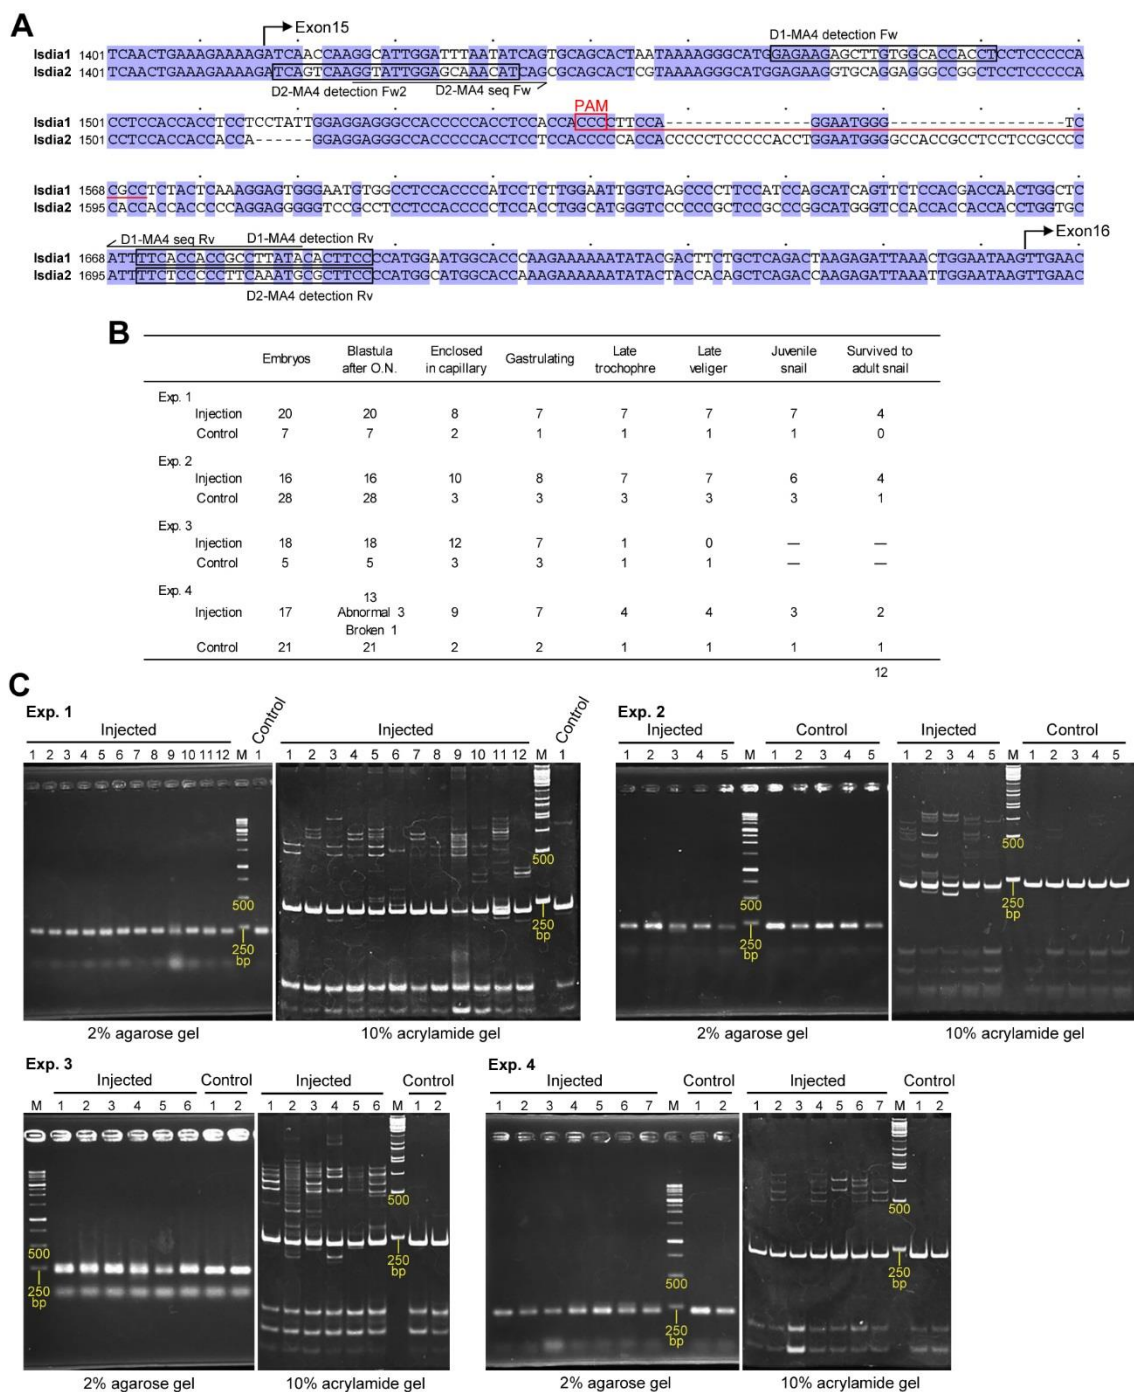

**Fig. S1. Targeting by CRISPR/Cas9 and follow up breeding experiments.**

(A) PAM and target sequence (20 bp, underlined in red) to discriminate *Lsdia1* from the *Lsdia2* gene. The PCR primers for HMA, D1-MA4 detection Fw and D1-MA4 detection Rv, are boxed. The PCR primer for genotyping, D1-MA4 seq Rv, is also indicated. (B) Summary table of CRISPR/Cas9 experiments. Some of the CRISPR/Cas9-injected and control embryos were encapsulated individually in a glass capillary tube at the blastula stage and bred to the juvenile stage, a step required for the normal growth of embryos. Ten injected and two control adult snails were obtained out of four independent CRISPR/Cas9 - breeding experiments, and they were named as snails 1 - 12. (C) The rest of the embryos not used for the breeding experiments were used for embryo-direct PCR for HMA on 2% agarose gel (left) and 10% polyacrylamide gel (right) electrophoresis. Lane M is the 1kb DNA Ladder size marker (FastGene).

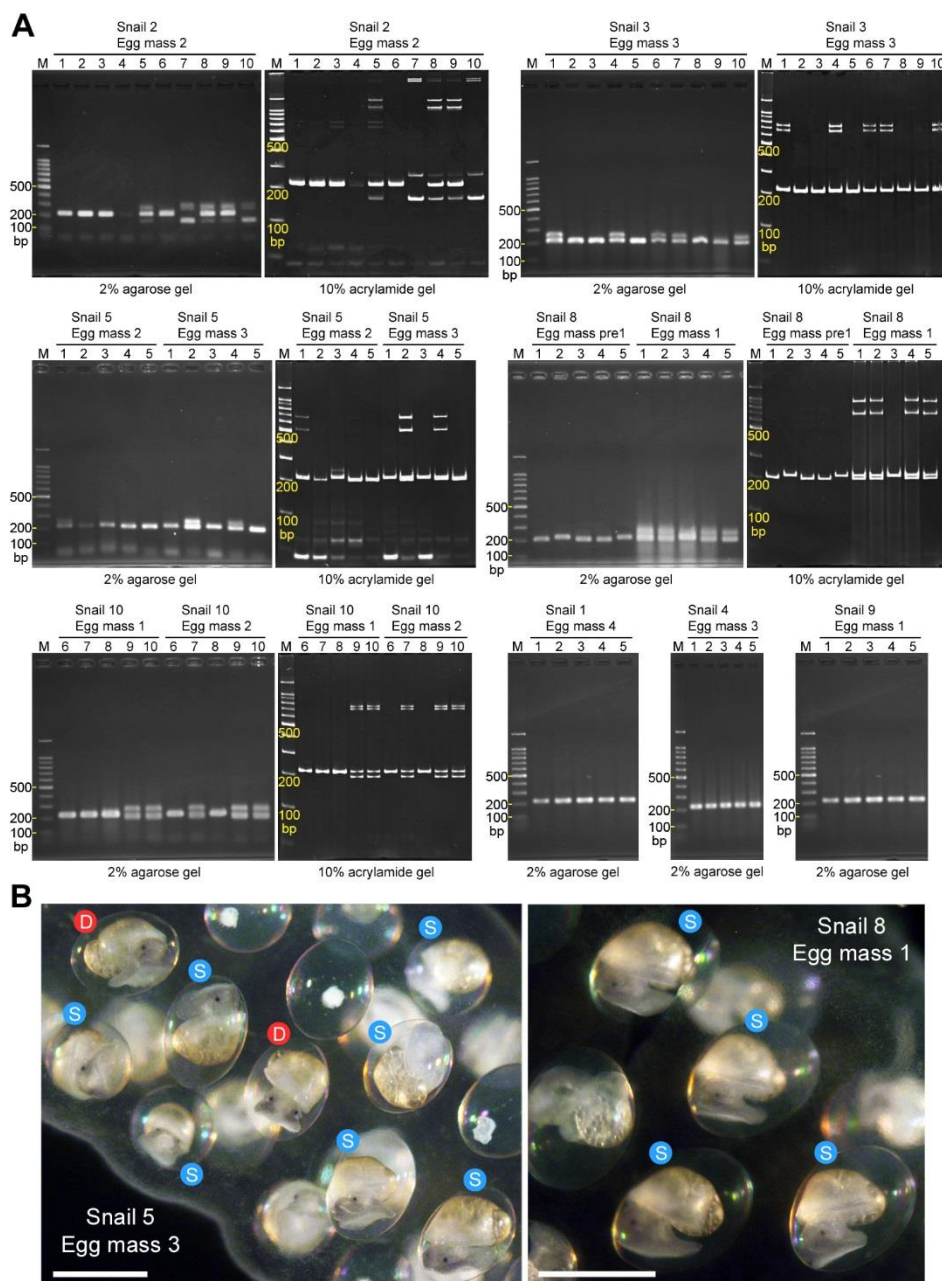

**Fig. S2. Efficient germline transmission.**

(A) Embryos oviposited by F0 were subjected to embryo-directed PCR and HMA by 2% agarose gel (left) and 10% polyacrylamide gel (right) electrophoresis for snails 2, 3, 5, 8 and 10, which showed germline transmission to F1. Germline transmission was not observed in snails 1, 4, 9 as shown by 2% agarose gel electrophoresis (Extended Data Table 1, External Data S1). Lane M is the 100bp DNA Ladder size marker (Promega). (B) Photographs of an egg mass containing both dextral and sinistral juveniles in the case of snail 5 (left) and only the sinistral juveniles for snail 8 (right). D in a red circle and S in a blue circle indicate dextral and sinistral snails, respectively. Scale bar: 1 mm.

**A**

| Mother snail (F1) | F2 snails used for phenotype check | Total egg masses laid | No. of offspring for each phenotype |                    |                 |                              | Total No. of embryos checked |     |      |
|-------------------|------------------------------------|-----------------------|-------------------------------------|--------------------|-----------------|------------------------------|------------------------------|-----|------|
|                   |                                    |                       | Dextral juvenile                    | Sinistral juvenile | Abnormal embryo | Arrested before Late veliger |                              |     |      |
| Snail 2-F1-20     | del57/del57                        | del57/del57           | 4                                   | 12                 | 1028            | 0                            | 17                           | 83  | 1128 |
| Snail 3-F1-7      | del5/del5                          | del5/del5             | 3                                   | 10                 | 0               | 146                          | 70                           | 216 | 432  |
| Snail 3-F1-17     | del7+ins1/del5                     | del5/del5             | 2                                   | 8                  | 2               | 257                          | 116                          | 298 | 673  |
|                   |                                    | del7+ins1/del5        | 3                                   | 10                 | 537             | 0                            | 1                            | 33  | 571  |
|                   |                                    | del7+ins1/del7+ins1   | 1                                   | 5                  | 424             | 0                            | 1                            | 53  | 478  |
| Snail 3-F1-5      | wt/del5                            | del5/del5             | 1                                   | 5                  | 0               | 124                          | 69                           | 126 | 319  |
|                   |                                    | wt/del5               | 2                                   | 6                  | 582             | 0                            | 2                            | 30  | 614  |
| Snail 5-F1-S68    | del4/del4                          | del4/del4             | 2                                   | 5                  | 0               | 167                          | 59                           | 110 | 336  |
| Snail 5-F1-D33    | del3/del4                          | del4/del4             | 3                                   | 10                 | 1               | 397                          | 141                          | 279 | 818  |
|                   |                                    | del3/del4             | 3                                   | 9                  | 1039            | 0                            | 9                            | 58  | 1106 |
|                   |                                    | del3/del3             | 1                                   | 3                  | 340             | 0                            | 7                            | 12  | 359  |
| Snail 8-F1-16     | ins1/ins1                          | ins1/ins1             | 2                                   | 2                  | 0               | 23                           | 6                            | 15  | 44   |
|                   |                                    |                       | 27                                  | 85                 |                 |                              |                              |     | 6878 |

**B**

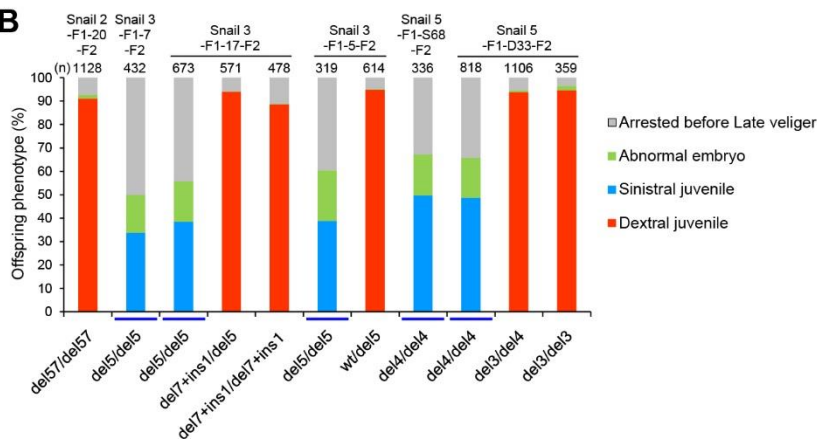

**Fig. S3. Gene-editing continues to alter the phenotype at the F3 generation.**

(A,B) Summary table and bar chart of offspring phenotype for the gene-edited snails (F2). Snail 8-F1-16-F2 was omitted from the chart due to insufficient data size. The offspring (F3) phenotype clearly depends on the F2 genotype. Homozygous knockout mutants (blue line;  $p < 0.0001$ , compared with the wild-type dextral in Fig. 2G).

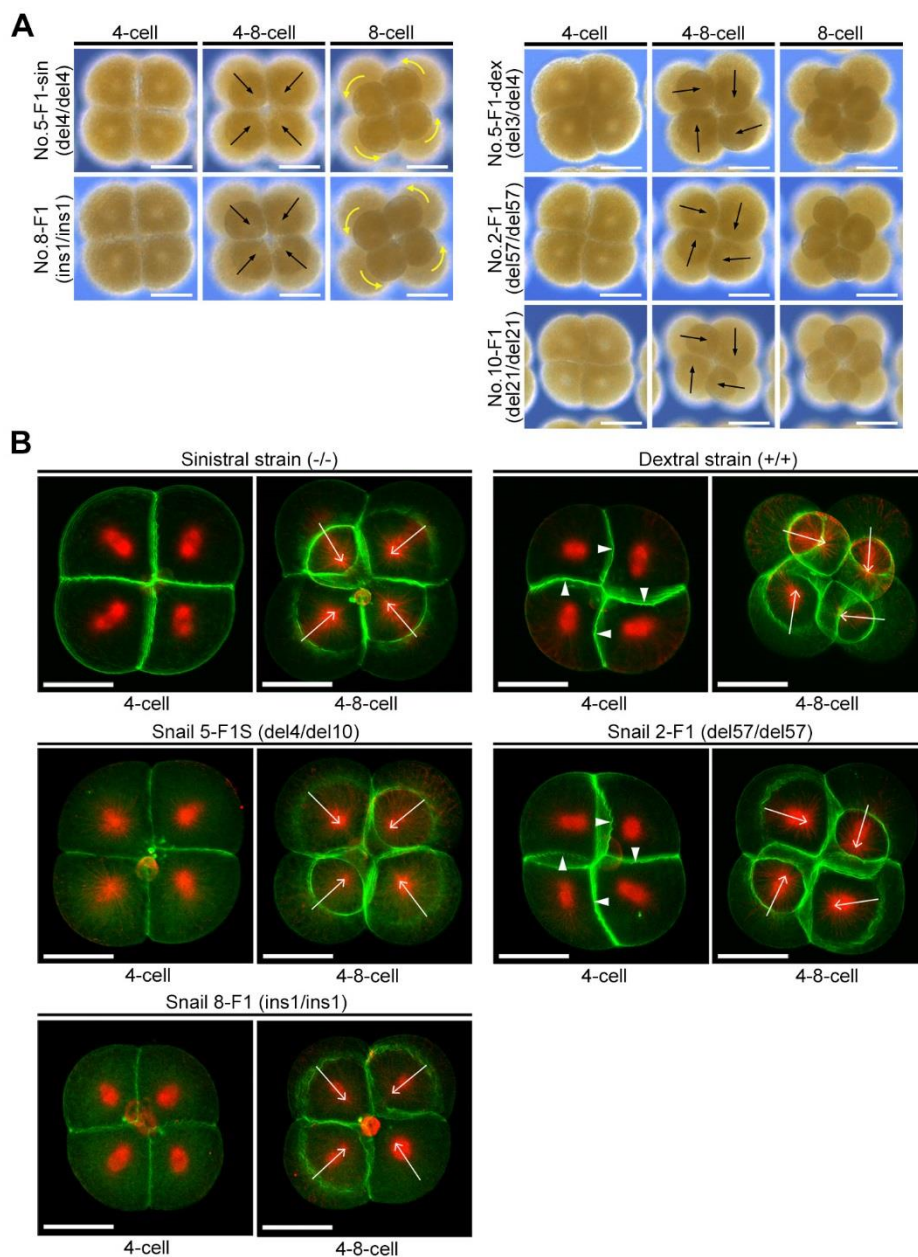

**Fig. S4. Cytoskeletal dynamics at the third cleavage are dictated by the gene-edited genotype.**

(A) The micromeres rotated to the clockwise direction with SD and SI for F2 embryos oviposited by the biallelic non-frameshift mutant, 2-F1 (del57/del57) and 10-F1 (del21/del21) as well as by the heterozygous knockout, 5-F1 (del3/del4), whereas the micromeres rotated to the anti-clockwise direction without SD or SI for the homozygous knockout, 5-F1-sin (del4/del4) and 8-F1 (ins1/ins1). Scale bar: 50  $\mu$ m. (B) Embryos at the 4-cell and 4- to 8- cell stages (metaphase-anaphase of the third cleavage) were double stained for filamentous actin with Alexa Fluor 488-labeled phalloidin (green) and  $\beta$ -tubulin with Cy3-labeled anti- $\beta$ -Tubulin antibody (red). White arrows point the direction of spindles and white arrowheads indicate the direction of SD for the dextral embryos. Scale bar: 50 $\mu$ m.



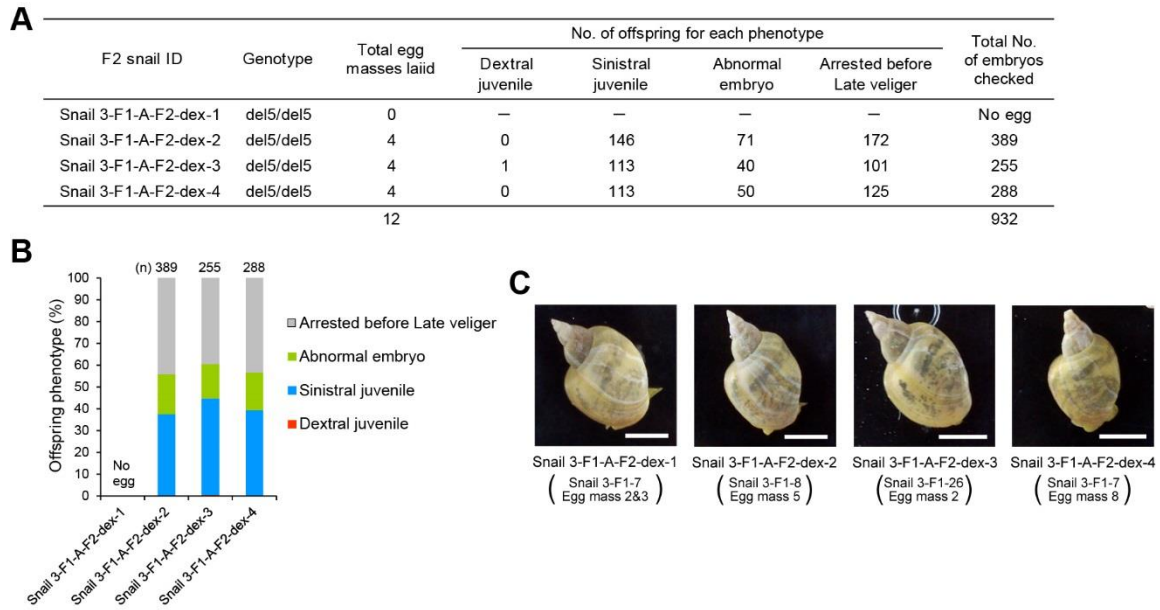

**Fig. S5. The very rare dextrally-coiled adults born from the homozygous knockout snails gave birth to sinistral offspring according to its own genotype.**

(A,B) Summary table and bar chart of offspring phenotype oviposited by the rare dextrally-coiled snails with homozygous knockout genotype ( $p < 0.0001$ , compared with the wild-type dextral in Fig. 2G). (C) Photographs of the very rare four dextral snails (F2) born from the homozygous knockout mother (F1). Scale bar: 1 cm.

**Table S1. Summary of the CRISPR/Cas9 injection experiments with the number of egg masses laid by F0 and the number of the respective phenotype of their offspring (F1).**

| F0 snail                    | Egg masses laid by F0 | Germline transmission <sup>a</sup> | No. of offspring for each phenotype |                    |                 |                              | Total No. of embryos checked |
|-----------------------------|-----------------------|------------------------------------|-------------------------------------|--------------------|-----------------|------------------------------|------------------------------|
|                             |                       |                                    | Dextral juvenile                    | Sinistral juvenile | Abnormal embryo | Arrested before Late veliger |                              |
| <b>CRISPR/Cas9-injected</b> |                       |                                    |                                     |                    |                 |                              |                              |
| Snail 1                     | 8                     | N.D.                               | 759                                 | 0                  | 21              | 68                           | 848                          |
| Snail 2                     | 8                     | D                                  | 446                                 | 0                  | 2               | 14                           | 462                          |
| Snail 3                     | 7                     | D                                  | 413                                 | 0                  | 1               | 17                           | 431                          |
| Snail 4                     | 5                     | N.D.                               | 244                                 | 0                  | 0               | 22                           | 266                          |
| Snail 5                     | 20                    | D                                  | 107                                 | 640                | 179             | 527                          | 1453                         |
| Snail 6                     | 0                     | No egg                             | —                                   | —                  | —               | —                            | —                            |
| Snail 7                     | 0                     | No egg                             | —                                   | —                  | —               | —                            | —                            |
| Snail 8                     | 5                     | D                                  | 0                                   | 117                | 21              | 53                           | 191                          |
| Snail 9                     | 3                     | N.D.                               | 262                                 | 0                  | 2               | 7                            | 271                          |
| Snail 10                    | 20                    | D                                  | 2135                                | 0                  | 11              | 142                          | 2288                         |
| <b>Control</b>              |                       |                                    |                                     |                    |                 |                              |                              |
| Snail 11                    | 3                     | N.D.                               | 187                                 | 0                  | 0               | 6                            | 193                          |
| Snail 12                    | 0                     | No egg                             | —                                   | —                  | —               | —                            | —                            |
|                             | 79                    |                                    |                                     |                    |                 |                              | 6403                         |

a: Germline transmission was studied by HMA and genotyping of F1. D: detected; N.D.: not detected.

**Table S2. Summary of the CRISPR/Cas9 experiments with F1 genotype, number of F1 snails studied and egg masses laid by the F1 snails, as well as the number of the respective phenotype of their offspring (F2).**

| Line           | Snails studied for genotyping <sup>a</sup> | F1 genotype and the no. of snails |    | F1 snails used for phenotype check <sup>b</sup> | Total egg masses laid | No. of offspring for each phenotype |                    |                 |                              | Total No. of embryos checked |
|----------------|--------------------------------------------|-----------------------------------|----|-------------------------------------------------|-----------------------|-------------------------------------|--------------------|-----------------|------------------------------|------------------------------|
|                |                                            |                                   |    |                                                 |                       | Dextral juvenile                    | Sinistral juvenile | Abnormal embryo | Arrested before Late veliger |                              |
| Dex            | —                                          | (+/+)                             |    | arbitrarily                                     | 26                    | 2346                                | 0                  | 5               | 38                           | 2389                         |
| Sin            | —                                          | (-/-)                             |    | arbitrarily                                     | 32                    | 2                                   | 1873               | 139             | 385                          | 2399                         |
| Snail 11-F1    | 8                                          | wt/wt                             | 8  | 5                                               | 31                    | 2287                                | 0                  | 6               | 109                          | 2402                         |
| Snail 1-F1     | 20                                         | wt/wt                             | 20 | 5                                               | 19                    | 1750                                | 0                  | 2               | 85                           | 1837                         |
| Snail 4-F1     | 14                                         | wt/wt                             | 14 | 4                                               | 17                    | 1619                                | 0                  | 4               | 56                           | 1679                         |
| Snail 9-F1     | 14                                         | wt/wt                             | 14 | 5                                               | 19                    | 1884                                | 0                  | 7               | 68                           | 1959                         |
| Snail 2-F1     | 81                                         | del57/del57                       | 20 | 6                                               | 30                    | 2256                                | 0                  | 10              | 139                          | 2405                         |
|                |                                            | wt/del57                          | 32 | 5                                               | 19                    | 1479                                | 0                  | 2               | 27                           | 1508                         |
|                |                                            | wt/wt                             | 29 | 5                                               | 22                    | 1625                                | 0                  | 9               | 69                           | 1703                         |
| Snail 3-F1     | 54                                         | del5/del5                         | 15 | 6                                               | 33                    | 10                                  | 1308               | 548             | 1334                         | 3200                         |
|                |                                            | wt/del7+ins1                      | 4  | 4                                               | 14                    | 1140                                | 0                  | 18              | 75                           | 1233                         |
|                |                                            | wt/del5                           | 23 | 5                                               | 25                    | 1787                                | 0                  | 18              | 128                          | 1933                         |
|                |                                            | del7+ins1/del5                    | 4  | 4                                               | 15                    | 1294                                | 0                  | 8               | 51                           | 1353                         |
|                |                                            | wt/wt                             | 8  | 5                                               | 24                    | 1872                                | 0                  | 11              | 104                          | 1987                         |
| Snail 5-F1-sin | 102                                        | del4/del4                         | 43 | 6                                               | 25                    | 0                                   | 950                | 300             | 777                          | 2027                         |
|                |                                            | del4/del10                        | 57 | 6                                               | 24                    | 1                                   | 1020               | 275             | 601                          | 1897                         |
|                |                                            | del3/del10                        | 2  | 2                                               | 7                     | 160                                 | 0                  | 3               | 7                            | 170                          |
| Snail 5-F1-dex | 35                                         | del4/del10                        | 14 | 5                                               | 18                    | 0                                   | 737                | 218             | 651                          | 1606                         |
|                |                                            | del3/del10                        | 8  | 4                                               | 17                    | 1407                                | 0                  | 12              | 87                           | 1506                         |
|                |                                            | del3/del4                         | 13 | 7                                               | 27                    | 2354                                | 0                  | 15              | 146                          | 2515                         |
| Snail 8-F1     | 67                                         | ins1/ins1                         | 18 | 6                                               | 19                    | 0                                   | 727                | 169             | 333                          | 1229                         |
|                |                                            | del13/del13                       | 13 | 7                                               | 26                    | 0                                   | 810                | 213             | 388                          | 1411                         |
|                |                                            | ins1/del17                        | 2  | 2                                               | 11                    | 0                                   | 430                | 103             | 208                          | 741                          |
|                |                                            | ins1/del4                         | 2  | 1                                               | 7                     | 0                                   | 310                | 34              | 93                           | 437                          |
|                |                                            | ins1/del13                        | 27 | 4                                               | 16                    | 0                                   | 661                | 122             | 260                          | 1043                         |
|                |                                            | del13/del17                       | 2  | 1                                               | 6                     | 0                                   | 124                | 54              | 83                           | 261                          |
|                |                                            | del4/del13                        | 3  | 2                                               | 13                    | 1                                   | 435                | 89              | 239                          | 764                          |
| Snail 10-F1    | 70                                         | del21/del21                       | 10 | 5                                               | 17                    | 1176                                | 0                  | 7               | 49                           | 1232                         |
|                |                                            | wt/del21                          | 33 | 5                                               | 17                    | 1297                                | 0                  | 6               | 54                           | 1357                         |
|                |                                            | wt/wt                             | 27 | 5                                               | 19                    | 1259                                | 0                  | 8               | 39                           | 1306                         |
|                | 465                                        |                                   |    | >127                                            | 595                   |                                     |                    |                 |                              | 47489                        |

a: Number of individual snails for each line, whose DNA was extracted from foot clips for genotyping.

b: Number of individual snails used for the offspring phenotype analysis. Total number of egg masses laid is given in the next right column. In the cases of wild-type snails, fresh egg masses were collected arbitrarily from the mass-breeding aquarium.

## Movies

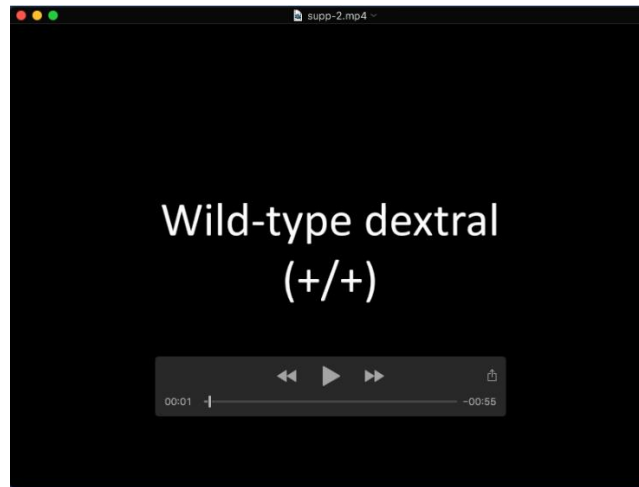

**Movie 1. The third cleavage pattern of the wild-type dextral and wild-type sinistral embryos.** Time-lapse images in this movie were obtained every 30 s.

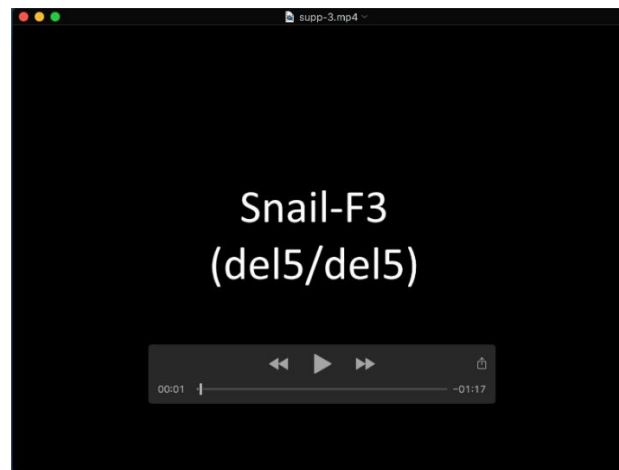

**Movie 2. The third cleavage pattern of the homozygous knockout snail embryos.** Time-lapse images in this movie were obtained every 30 s.



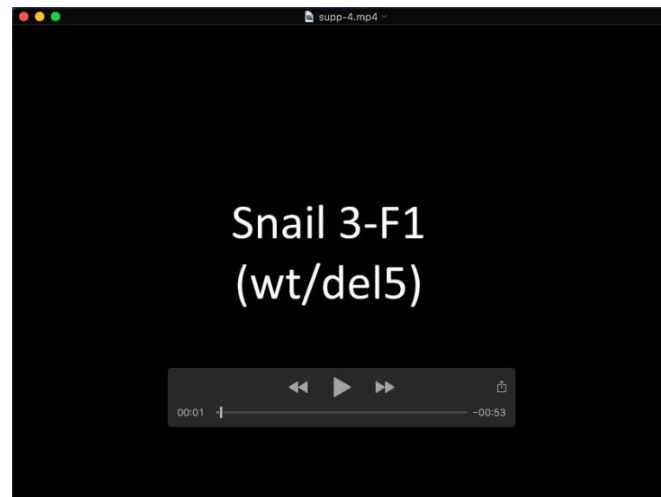

**Movie 3. The third cleavage pattern of the heterozygous knockout snail embryos.** Time-lapse images in this movie were obtained every 30 s.

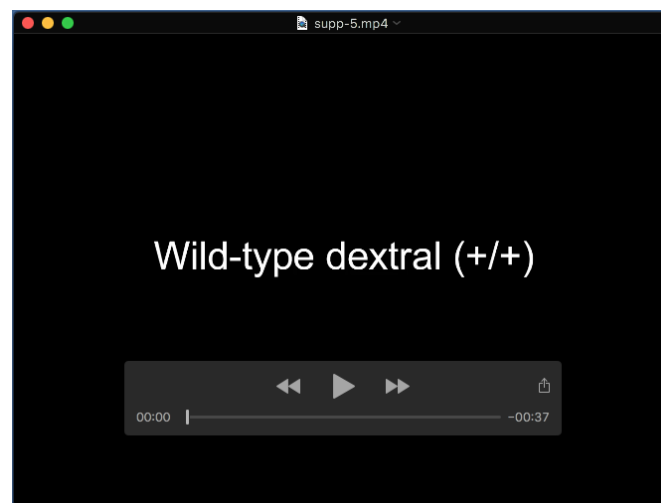

**Movie 4. The first cleavage pattern of the trypsin treated 1-cell stage embryos.** Time-lapse images in this movie were obtained every 20 s.
